# Supplementary material for: SLC38A1 as a novel therapeutic target in upper tract urothelial carcinoma via regulating cell proliferation and migration through suppressing Akt/mTOR signaling
Source: Research Square preprint supplement (doi:10.21203/rs.3.rs-5635396/v1), 2024-12-18
Supplement: Supplementary file 1 [file f5aa96044b843bcfcaa0a766.docx]

**Supplementary**

**Table S1**. Immunodetecting antibodies and working conditions used in this study

| Target proteins | Host animals | Dilution folds for IF/WB | Dilution folds for IHC | Maker (Cat. No.) |
| --- | --- | --- | --- | --- |
| SLC38A1 | R |  | 1:50 | GeneTex(GTX46848) |
| Ki-67 | R | 1:1000 | 1:100 | Abcam (ab15580) |
| NF-B | R | 1:100 |  | Abcam (ab32536) |
| MMP-9 | R | 1:200 |  | Cell Signaling (13667) |
| AKT | R | 1:1000 |  | Cell Signaling (4691) |
| Phospho -AKT | R | 1:2000 |  | Cell Signaling (4060) |
| mTOR | R | 1:1000 |  | Cell Signaling (2983) |
| Phospho-mTOR | R | 1:1000 |  | Cell Signaling (5536) |
| GAPDH | M | 1:10000 | N/A | GeneTex(GTX627408) |
| Mouse IgG | G | 1:5000 | 1:2000 | Invitrogen (62-6520) |
| Rabbit IgG | G | 1:3000 | 1:2000 | Invitrogen (65-6120) |

M, mouse; R, rabbit; G, goat; IF, immunofluorescence; WB, western blotting; IHC, immunohistochemistry; N/A, not applied.
